# Supplementary material
Source: Research Square preprint supplement (doi:10.21203/rs.3.rs-10093397/v1)
Supplement: Supplementary file 1 [file 27ca0b9e0eab330b168c463a.docx]

**Supplementary Table 1: Multigroup structural equation model- comparison of path coefficients between staff and students**

| **Path** | **Staff (n= 448)** | | **Students (n= 2152)** | |
| --- | --- | --- | --- | --- |
| **B** | **p- value** | **B** | **p- value** |
| **IDA knowledge→ HBM constructs** | | | | |
| Knowledge→ Perceived susceptibility | 0.04 | 0.113 | 0.10 | <0.001 |
| Knowledge→ Perceived severity | 0.27 | <0.001 | 0.31 | <0.001 |
| Knowledge Perceived benefits | 0.30 | <0.001 | 0.31 | <0.001 |
| Knowledge→ Perceived barriers | 0.03 | 0.191 | -0.08 | <0.001 |
| Knowledge→ Perceived Self-efficacy | 0.19 | <0.001 | 0.18 | <0.001 |
| **HBM constructs→ Dietary practices** | | | | |
| Susceptibility→ Dietary practices | -0.06 | 0.024 | -0.01 | -0.638 |
| Severity→ Dietary practices | 0.15 | <0.001 | 0.10 | <0.001 |
| Benefits→ Dietary practices | 0.07 | 0.072 | 0.06 | 0.004 |
| Barriers→ Dietary practices | 0.03 | 0.352 | 0.05 | 0.004 |
| Self-efficacy→ Dietary practices | 0.08 | 0.035 | 0.14 | <0.001 |
| **Digital health literacy and food environment→ Dietary practices** | | | | |
| eHEALS→ Dietary practices | 0.06 | 0.245 | 0.13 | <0.001 |
| Food environment→ Dietary practices | 0.35 | <0.001 | 0.24 | <0.001 |
| **Dietary practices→ Symptoms→ Productivity** | | | | |
| Dietary practices→ IDA symptoms | 0.07 | 0.342 | 0.38 | <0.001 |
| IDA symptoms→ Productivity | 1.157 | <0.001 | 0.65 | <0.001 |
| **Model fit indices** | | | | |
| χ 2(df) | χ 2(36)= 1543.76 | | | |
| CFI | 0.88 | | | |
| TLI | 0.64 | | | |
| RMSEA (90% CI) | 0.18 (0.17, 0.19) | | | |
| p- value | <0.001 | | | |

B= unstandardized path coefficient. The most striking group difference was the dietary practices → IDA symptoms path, which was not significant for staff (B= 0.072, p= 0.342) but strongly significant for students (B = 0.383, p < 0.001), which suggested that the diet- symptom relationship operates differently across the two groups. The knowledge→ perceived barriers path showed an opposite direction between groups, positive for staff (B= 0.034) and negative for students (B= -0.081). maximum likelihood with missing values (mlmv) was used as estimation method. H5 exploratorily supported several structural paths that differed significantly between students and staff. IDA = Iron Deficiency Anemia, eHEALS = eHealth Literacy Scale and HBM = Health Belief Model. Unstandardized path coefficients (B) are reported for group comparisons as standardized coefficients are not directly comparable across groups with different variances (Kline, 2023). CFI= Comparative Fit Index, TLI = Tucker-Lewis Index and RMSEA = Root Mean Square Error of Approximation.

**Supplementary Table 2: Sensitivity analysis- path coefficients consistency across three alternative model specifications**

| **Path** | **Main model** | | **S1: Excluding diagnosed anemia** | | **S2: Excluding supplement users** | | **S3: Adding age and income as additional covariates** | |
| --- | --- | --- | --- | --- | --- | --- | --- | --- |
| **B** | **p- value** | **B** | **p- value** | **B** | **p- value** | **B** | **p- value** |
| **IDA knowledge→ HBM constructs** | | | | |  |  |  |  |
| Knowledge→ Perceived susceptibility | 0.09 | <0.001 | 0.03 | 0.027 | 0.06 | <0.001 | 0.09 | <0.001 |
| Knowledge→ Perceived severity | 0.30 | <0.001 | 0.29 | <0.001 | 0.28 | <0.001 | 0.30 | <0.001 |
| Knowledge Perceived benefits | 0.31 | <0.001 | 0.30 | <0.001 | 0.29 | <0.001 | 0.31 | <0.001 |
| Knowledge→ Perceived barriers | -0.06 | <0.001 | 0.03 | 0.014 | -0.04 | <0.001 | -0.06 | <0.001 |
| Knowledge→ Perceived self-efficacy | 0.18 | <0.001 | 0.17 | <0.001 | 0.16 | <0.001 | 0.18 | <0.001 |
| **HBM constructs→ Dietary practices** | | | | |  |  |  |  |
| Susceptibility→ Dietary practices | -0.02 | 0.140 | -0.00 | 0.819 | -0.02 | 0.158 | -0.02 | 0.172 |
| Severity→ Dietary practices | 0.11 | <0.001 | 0.10 | <0.001 | 0.10 | <0.001 | 0.11 | <0.001 |
| Benefits→ Dietary practices | 0.06 | 0.001 | 0.06 | 0.019 | 0.07 | 0.001 | 0.06 | <0.001 |
| Barriers→ Dietary practices | 0.05 | 0.002 | 0.06 | 0.002 | 0.07 | <0.001 | 0.04 | 0.010 |
| Self-efficacy→ Dietary practices | 0.13 | <0.001 | 0.16 | <0.001 | 0.14 | <0.001 | 0.134 | <0.001 |
| **Digital health literacy and food environment→ Dietary practices** | | | | |  |  |  |  |
| eHEALS→ Dietary practices | 0.12 | <0.001 | 0.11 | <0.001 | 0.12 | <0.001 | 0.11 | <0.001 |
| Food environment→ Dietary practices | 0.26 | <0.001 | 0.22 | <0.001 | 0.23 | <0.001 | 0.25 | <0.001 |
| **Dietary practices→ Symptoms→ Productivity** | | | | |  |  |  |  |
| Dietary practices→ IDA symptoms | 0.33 | <0.001 | 0.20 | <0.001 | 0.22 | <0.001 | 0.33 | <0.001 |
| IDA symptoms→ Productivity | 0.76 | <0.001 | 0.96 | <0.001 | 0.94 | <0.001 | 0.76 | <0.001 |
| **Additional control variables- Sensitivity 3 only** | | | | | | | | |
| Age→ Dietary Practices | - | - | - | - | - | - | 0.01 | 0.002 |
| Income→ Dietary Practices | - | - | - | - | - | - | 0.01 | 0.023 |
| **Model fit indices** | | | | | | | | |
| CFI | 0.88 | | 0.28 | | 0.28 | | 0.28 | |
| TLI | 0.63 | | 0.01 | | 0.01 | | -0.16 | |
| RMSEA | 0.18 | | 0.27 | | 0.27 | | 0.28 | |
| N | 2600 | | 1431 | | 2058 | | 2600 | |

B= unstandardized path coefficient. S1 = Sensitivity 1: participants with a confirmed prior IDA or anemia diagnosis excluded (n = 1,431), S2 = Sensitivity 2: current iron supplement users excluded (n = 2,058) and S3 = Sensitivity 3: age and monthly household income added as additional covariates (N = 2,600). Sensitivity models were estimated without correlated residuals among HBM construct pairs, which resulted in lower global fit indices compared with the main model. The primary purpose of sensitivity analysis is to assess the stability of path coefficients rather than model fit. All paths showed consistent direction and significance patterns across all three specifications, supporting the robustness of the main model findings. eHEALS= eHealth Literacy Scale, IDA = Iron Deficiency Anemia, and HBM = Health Belief Model. CFI= Comparative Fit Index, TLI = Tucker-Lewis Index and RMSEA = Root Mean Square Error of Approximation.

**References:**

Kline, R. B. (2023). *Principles and practice of structural equation modeling*. Guilford publications.
